# Supplementary material for: Molecular and SNP characterization of two genome specific transcription factor genes GhMyb8 and GhMyb10 in cotton species
Source: Springer Nature journal article supplement (doi:10.1007/s10681-007-9485-4), 2007-06-30
Supplement: MOESM2 [file 10681_2007_9485_MOESM2_ESM.doc]

**Supplementary Table 2.** Sequence variation and haplotype analysis of the *GhMyb8* gene fragment

| Haplotype | Genotype | Position | | | | | | | | | | | | | | | | | | | | | | |
| --- | --- | --- | --- | --- | --- | --- | --- | --- | --- | --- | --- | --- | --- | --- | --- | --- | --- | --- | --- | --- | --- | --- | --- | --- |
| 892 | 1089 | 1109 | 1141 | 1201 | 1254 | 1335 | 1345 | 1368 | 1397 | 1415 | 1433 | 1441 | 1453 | 1459 | 1473 | 1484 | 1491 | 1511 | 1556 | 1563 | 1565 | 1596 |
| I | *G. hirsutum*  (TM-1) | c | t | t | g | c | t | a | c | a | a | t | g | t | a | c | t | c | t | t | g | c | c | a |
| I | *G. hirsutum* (MAR) | c | t | t | g | c | t | a | c | a | a | t | g | t | a | c | t | c | t | t | g | c | c | a |
| I | *G. hirsutum* (HS46) | c | t | t | g | c | t | a | c | a | a | t | g | t | a | c | t | c | t | t | g | c | c | a |
| I | *G. hirsutum* (DES119) | c | t | t | g | c | t | a | c | a | a | t | g | t | a | c | t | c | t | t | g | c | c | a |
| II | *G. barbadense* (3-79) | c | t | g | g | t | t | a | c | a | a | t | g | t | a | t | c | c | t | c | a | c | c | a |
| III | *G. mustelinum* | c | a | t | g | c | t | a | c | a | a | t | g | t | - | c | t | c | t | c | a | c | c | a |
| IV | *G. tomentosum* | c | t | t | g | t | t | a | c | a | a | t | g | t | a | t | c | c | t | a | a | c | c | a |
| V | *G. raimondii* | g | a | t | a | c | g | g | t | g | c | c | a | a | a | c | t | t | c | t | a | t | g | g |
